# Supplementary material
Source: publisher site journal article supplement (https://www.dovepress.com/article/393993)
Supplement: Supplementary file 1 [file get_supplementary_file.php]

**Appendix 1 Summary of 1132 features.**

| Feature category | Feature name | Feature number |
| --- | --- | --- |
| Original | Shape | 14 |
| Firstorder | 18 |
| Glcm | 22 |
| Glrlm | 16 |
| Glszm | 16 |
| Gldm | 14 |
| Laplace of Gaussian | Firstorder | 72 |
| Glcm | 88 |
| Glrlm | 64 |
| Glszm | 64 |
| Gldm | 56 |
| Wavelet | LLH | 86 |
| LHL | 86 |
| LHH | 86 |
| HLL | 86 |
| HLH | 86 |
| HHL | 86 |
| HHH | 86 |
| LLL | 86 |

Abbreviations: Glcm, Gray Level Co-Occurrence Matrix; Glrlm, Gray run length matrix; Glszm, Gray size zone matrix; Gldm, Gray level dependence matrix; Log, Laplace of Gaussian.

**Appendix 2 Results of univariate analysis**

|  | Variable | OddsRatio | Lower | Upper | P value |
| --- | --- | --- | --- | --- | --- |
| T2WI model | T2WI_log_sigma_3_0_mm_3D_glcm_InverseVariance | 1.790 | 1.101 | 2.911 | 0.019 |
| T2WI_wavelet_LHL_firstorder_Mean | 0.610 | 0.386 | 0.965 | 0.035 |
| T2WI_wavelet_HLL_glcm_ClusterShade | 1.647 | 1.008 | 2.693 | 0.047 |
| T2WI_wavelet_HHL_firstorder_InterquartileRange | 0.600 | 0.388 | 0.927 | 0.021 |
| T2WI_wavelet_HHH_glcm_Idm | 0.640 | 0.419 | 0.977 | 0.039 |
| T2WI_wavelet_HHH_gldm_LargeDependenceLowGrayLevelEmphasis | 0.423 | 0.237 | 0.755 | 0.004 |
| CE_T1WI model | CE-T1WI_original_shape_SurfaceVolumeRatio | 0.627 | 0.410 | 0.959 | 0.031 |
| CE-T1WI_log_sigma_4_0_mm_3D_glcm_Imc1 | 1.686 | 1.096 | 2.593 | 0.018 |
| CE-T1WI_log_sigma_4_0_mm_3D_glcm_Imc2 | 0.602 | 0.374 | 0.971 | 0.038 |
| CE-T1WI_log_sigma_4_0_mm_3D_glszm_ZonePercentage | 0.633 | 0.414 | 0.966 | 0.034 |
| CE-T1WI_log_sigma_5_0_mm_3D_glrlm_LongRunLowGrayLevelEmphasis | 0.534 | 0.336 | 0.850 | 0.008 |
| CE-T1WI_wavelet_LLH_firstorder_Minimum | 0.541 | 0.309 | 0.947 | 0.032 |
| CE-T1WI_wavelet_LHH_firstorder_Uniformity | 0.471 | 0.293 | 0.757 | 0.002 |
| CE-T1WI_wavelet_LHH_glrlm_LongRunLowGrayLevelEmphasis | 0.380 | 0.199 | 0.725 | 0.003 |
| CE-T1WI_wavelet_LHH_glszm_LargeAreaLowGrayLevelEmphasis | 0.384 | 0.180 | 0.821 | 0.014 |
| CE-T1WI_wavelet_LHH_gldm_LargeDependenceHighGrayLevelEmphasis | 1.869 | 1.038 | 3.367 | 0.037 |
| CE-T1WI_wavelet_LHH_gldm_LargeDependenceLowGrayLevelEmphasis | 0.148 | 0.042 | 0.528 | 0.003 |
| CE-T1WI_wavelet_HLH_firstorder_Kurtosis | 1.727 | 1.014 | 2.943 | 0.044 |
| CE-T1WI_wavelet_HLH_firstorder_Uniformity | 0.511 | 0.326 | 0.802 | 0.003 |
| CE-T1WI_wavelet_HLH_glcm_JointAverage | 1.802 | 1.089 | 2.983 | 0.022 |
| CE-T1WI_wavelet_HLH_glcm_Id | 0.625 | 0.407 | 0.960 | 0.032 |
| CE-T1WI_wavelet_HLH_glcm_InverseVariance | 0.549 | 0.353 | 0.855 | 0.008 |
| CE-T1WI_wavelet_HLH_glcm_MaximumProbability | 0.598 | 0.389 | 0.920 | 0.019 |
| CE-T1WI_wavelet_HLH_glrlm_ShortRunLowGrayLevelEmphasis | 0.461 | 0.289 | 0.735 | 0.001 |
| CE-T1WI_wavelet_HHL_firstorder_Range | 1.564 | 1.005 | 2.434 | 0.048 |
| CE-T1WI_wavelet_HHL_glcm_Idm | 0.519 | 0.320 | 0.843 | 0.008 |
| CE-T1WI_wavelet_HHH_firstorder_Maximum | 2.489 | 1.316 | 4.707 | 0.005 |
| CE-T1WI_wavelet_HHH_firstorder_Minimum | 0.626 | 0.401 | 0.977 | 0.039 |
| CE-T1WI_wavelet_HHH_firstorder_Uniformity | 0.320 | 0.166 | 0.616 | 0.001 |
| CE-T1WI_wavelet_HHH_glcm_Id | 0.529 | 0.331 | 0.846 | 0.008 |
| CE-T1WI_wavelet_HHH_glrlm_RunLengthNonUniformityNormalized | 1.647 | 1.064 | 2.549 | 0.025 |
| Combined model | CE-T1WI_log_sigma_2_0_mm_3D_firstorder_Entropy | 1.532 | 1.005 | 2.337 | 0.048 |
| CE-T1WI_log_sigma_3_0_mm_3D_glcm_Correlation | 1.611 | 1.053 | 2.466 | 0.028 |
| CE-T1WI_log_sigma_3_0_mm_3D_glcm_Imc1 | 1.675 | 1.082 | 2.594 | 0.021 |
| CE-T1WI_log_sigma_4_0_mm_3D_glcm_Imc2 | 0.574 | 0.353 | 0.935 | 0.026 |
| CE-T1WI_log_sigma_4_0_mm_3D_glrlm_RunVariance | 1.740 | 1.037 | 2.917 | 0.036 |
| CE-T1WI_log_sigma_4_0_mm_3D_glszm_ZonePercentage | 0.570 | 0.369 | 0.881 | 0.011 |
| CE-T1WI_log_sigma_5_0_mm_3D_glrlm_LongRunLowGrayLevelEmphasis | 0.485 | 0.298 | 0.790 | 0.004 |
| CE-T1WI_wavelet_LHL_glszm_HighGrayLevelZoneEmphasis | 1.846 | 1.015 | 3.357 | 0.045 |
| CE-T1WI_wavelet_LHL_gldm_LargeDependenceHighGrayLevelEmphasis | 2.695 | 1.090 | 6.666 | 0.032 |
| CE-T1WI_wavelet_LHH_firstorder_Uniformity | 0.521 | 0.330 | 0.823 | 0.005 |
| CE-T1WI_wavelet_LHH_glrlm_LongRunLowGrayLevelEmphasis | 0.418 | 0.222 | 0.786 | 0.007 |
| CE-T1WI_wavelet_LHH_glszm_LargeAreaLowGrayLevelEmphasis | 0.478 | 0.250 | 0.915 | 0.026 |
| CE-T1WI_wavelet_LHH_gldm_LargeDependenceLowGrayLevelEmphasis | 0.245 | 0.071 | 0.843 | 0.026 |
| CE-T1WI_wavelet_HLL_gldm_SmallDependenceLowGrayLevelEmphasis | 0.644 | 0.422 | 0.981 | 0.041 |
| CE-T1WI_wavelet_HLH_firstorder_Uniformity | 0.550 | 0.354 | 0.855 | 0.008 |
| CE-T1WI_wavelet_HLH_glcm_InverseVariance | 0.641 | 0.420 | 0.978 | 0.039 |
| CE-T1WI_wavelet_HLH_glrlm_ShortRunLowGrayLevelEmphasis | 0.488 | 0.309 | 0.773 | 0.002 |
| CE-T1WI_wavelet_HHL_firstorder_Range | 1.598 | 1.024 | 2.494 | 0.039 |
| CE-T1WI_wavelet_HHL_glcm_Idm | 0.595 | 0.376 | 0.942 | 0.027 |
| CE-T1WI_wavelet_HHH_firstorder_Maximum | 2.274 | 1.232 | 4.199 | 0.009 |
| CE-T1WI_wavelet_HHH_firstorder_Uniformity | 0.358 | 0.191 | 0.670 | 0.001 |
| CE-T1WI_wavelet_HHH_glcm_DifferenceEntropy | 1.651 | 1.080 | 2.524 | 0.021 |
| CE-T1WI_wavelet_HHH_glcm_Id | 0.594 | 0.381 | 0.926 | 0.021 |
| CE-T1WI_wavelet_HHH_glrlm_LongRunEmphasis | 0.639 | 0.411 | 0.993 | 0.046 |
| T2WI_original_firstorder_Minimum | 0.655 | 0.429 | 0.998 | 0.049 |
| T2WI_log_sigma_3_0_mm_3D_glcm_InverseVariance | 1.622 | 1.020 | 2.581 | 0.041 |
| T2WI_wavelet_HHH_gldm_LargeDependenceLowGrayLevelEmphasis | 0.453 | 0.258 | 0.795 | 0.006 |

Abbreviations: T2WI, T2-weighted; CE-T1WI, contrast-enhanced T1WI; CI, confidence interva; glcm, Gray Level Co-Occurrence Matrix; glrlm, Gray run length matrix; Glszm, Gray size zone matrix; gldm, Gray level dependence matrix; log, Laplace of Gaussian.
